# Supplementary material for: Attenuating the emergence of anti-fungal drug resistance by harnessing synthetic lethal interactions in a model organism
Source: PLoS Genet. 2019 Aug 19;15(8):e1008259. doi: 10.1371/journal.pgen.1008259 (PMC6715234; doi:10.1371/journal.pgen.1008259)
Supplement: S1 Table — A comprehensive list of interactions from SGA screens for PDR1 wildtype and PDR1 gain-of-function mutation L280F. (XLSX) [file pgen.1008259.s002.xlsx]

## Sheet: Functional Analysis
n= 123
k: number of genes from the input cluster in given category. f: number of genes total in given category.
GO Molecular Function
Category	p-value	In Category from Cluster	k	f
xenobiotic-transporting ATPase activity	2.37e-05	SNQ2 YOR1 PDR5	3	4
tricarboxylate secondary active transmembrane transporter activity	0.0003331	CTP1 YHM2	2	2
ATPase activity, coupled to transmembrane movement of substances	0.0008584	SNQ2 YOR1 BPT1 PDR5	4	24
ATPase activity	0.000978	ISW1 SNQ2 YFH7 YOR1 BPT1 IOC4 PDR5 NEW1	8	112
DNA binding	0.001264	HPC2 ISW1 NHP10 MBP1 EAF1 SPT3 URC2 RTF1 SMI1 STP2 IXR1 IOC4 YHM2 RTG1 MSN1 CHL1 RLM1 ROX1	18	449
nucleosome binding	0.004006	HPC2 ISW1 IOC4	3	18
structural constituent of ribosome	0.006468	RPS8A RPS6B RPS14A RPS16B RPS26B RPS0A RPS21B RPL14A RPL31B RPS18B	10	218
histone methyltransferase activity (H3-K4 specific)	0.008676	SWD3 SDC1	2	8
GO Biological Process
Category	p-value	In Category from Cluster	k	f
regulation of transcription, DNA-dependent	3.664e-06	DEP1 HPC2 SWC5 ISW1 NHP10 MBP1 RXT3 EAF1 SPT3 SDC1 URC2 RTF1 ELP2 SMI1 IXR1 SWC7 IOC4 ELP6 YAF9 RTG1 MSN1 LEO1 RLM1 ELP4 ROX1	25	507
transcription, DNA-dependent	3.421e-05	DEP1 HPC2 SWC5 ISW1 NHP10 MBP1 RXT3 EAF1 SPT3 URC2 RTF1 ELP2 SMI1 IXR1 SWC7 IOC4 ELP6 YAF9 RTG1 MSN1 LEO1 RLM1 ELP4 ROX1	24	540
ATP catabolic process	7.712e-05	SNQ2 YFH7 YOR1 BPT1 PDR5 NEW1	6	40
chromatin modification	0.0002228	DEP1 HPC2 SWC5 ISW1 RXT3 EAF1 SPT3 SWC7 YAF9	9	114
mitochondrial citrate transport	0.0003331	CTP1 YHM2	2	2
response to drug	0.001008	SNQ2 YOR1 ROD1 PDR5	4	25
chromatin remodeling	0.001904	SWC5 ISW1 SWC7 IOC4 YAF9	5	49
protein lipoylation	0.001951	AIM22 LIP5	2	4
endonucleolytic cleavage to generate mature 3'-end of SSU-rRNA from (SSU-rRNA, 5.8S rRNA, LSU-rRNA)	0.001951	RPS0A RPS21B	2	4
mRNA stabilization	0.003212	IGO2 CBT1	2	5
translation	0.005249	RPS8A RPS6B RPS14A RPS16B RPS26B RPS0A RRF1 RPS21B RPL14A TEF4 RPL31B RPS18B SKI7	13	318
histone methylation	0.006585	RTF1 LEO1	2	7
protein urmylation	0.006585	ELP2 ELP6	2	7
trehalose biosynthetic process	0.006585	TPS1 TPS2	2	7
tRNA wobble uridine modification	0.009174	ELP2 ELP6 ELP4	3	24

## Sheet: PDR1 Synthetic lethal 
Gene	Description
HTD2	Mitochondrial 3-hydroxyacyl-thioester dehydratase; involved in fatty acid biosynthesis, required for respiratory growth and for normal mitochondrial morphology
ELP4	Subunit of hexameric RecA-like ATPase Elp456 Elongator subcomplex; which is required for modification of wobble nucleosides in tRNA; required for Elongator structural integrity
ELP2	Subunit of Elongator complex; Elongator is required for modification of wobble nucleosides in tRNA; target of Kluyveromyces lactis zymocin
AIM22	Putative lipoate-protein ligase; required along with Lip2 and Lip5 for lipoylation of Lat1p and Kgd2p; similar to E. coli LplA; null mutant displays reduced frequency of mitochondrial genome loss
ELP6	Subunit of hexameric RecA-like ATPase Elp456 Elongator subcomplex; which is required for modification of wobble nucleosides in tRNA; required for Elongator structural integrity
SOD2	Mitochondrial manganese superoxide dismutase; protects cells against oxygen toxicity; phosphorylated
SWC5	Component of the SWR1 complex; complex exchanges histone variant H2AZ (Htz1p) for chromatin-bound histone H2A; protein abundance increases in response to DNA replication stress; relocalizes to the cytosol in response to hypoxia
SLM3	tRNA-specific 2-thiouridylase; responsible for 2-thiolation of the wobble base of mitochondrial tRNAs; human ortholog is implicated in myoclonus epilepsy associated with ragged red fibers (MERRF)
TPS2	Phosphatase subunit of the trehalose-6-P synthase/phosphatase complex; involved in synthesis of the storage carbohydrate trehalose; expression is induced by stress conditions and repressed by the Ras-cAMP pathway; protein abundance increases in response to DNA replication stress
TPS1	Synthase subunit of trehalose-6-P synthase/phosphatase complex; synthesizes the storage carbohydrate trehalose; also found in a monomeric form; expression is induced by the stress response and repressed by the Ras-cAMP pathway; protein abundance increases in response to DNA replication stress and in response to prolonged exposure to boric acid
GUT2	Mitochondrial glycerol-3-phosphate dehydrogenase; expression is repressed by both glucose and cAMP and derepressed by non-fermentable carbon sources in a Snf1p, Rsf1p, Hap2/3/4/5 complex dependent manner
PDR5	Plasma membrane ATP-binding cassette (ABC) transporter; multidrug transporter actively regulated by Pdr1p; also involved in steroid transport, cation resistance, and cellular detoxification during exponential growth; PDR5 has a paralog, PDR15, that arose from the whole genome duplication
CKA2	Alpha' catalytic subunit of casein kinase 2 (CK2); CK2 is a Ser/Thr protein kinase with roles in cell growth and proliferation; CK2, comprised of CKA1, CKA2, CKB1 and CKB2, has many substrates including transcription factors and all RNA polymerases; protein abundance increases in response to DNA replication stress; regulates Fkh1p-mediated donor preference during mating-type switching
NGR1	RNA binding protein that negatively regulates growth rate; interacts with the 3' UTR of the mitochondrial porin (POR1) mRNA and enhances its degradation; overexpression impairs mitochondrial function; interacts with Dhh1p to mediate POR1 mRNA decay; expressed in stationary phase
CHL1	Probable DNA helicase; involved in sister-chromatid cohesion and genome integrity and interstrand cross-link repair; interacts with ECO1 and CTF18; mutants are defective in silencing, rDNA recombination, aging and the heat shock response; FANCJ-like helicase family member; mutations in the human homolog, DDX11/ChLR1, cause Warsaw breakage syndrome
STE50	Adaptor protein for various signaling pathways; involved in mating response, invasive/filamentous growth, osmotolerance; acts as an adaptor that links G protein-associated Cdc42p-Ste20p complex to the effector Ste11p to modulate signal transduction
SNQ2	Plasma membrane ATP-binding cassette (ABC) transporter; multidrug transporter involved in multidrug resistance and resistance to singlet oxygen species
GLC8	Regulatory subunit of protein phosphatase 1 (Glc7p); involved in glycogen metabolism and chromosome segregation; proposed to regulate Glc7p activity via conformational alteration; ortholog of the mammalian protein phosphatase inhibitor 2; protein abundance increases in response to DNA replication stress

## Sheet: PDR1 Synthetic Sick
AAH1
AIM24
AIM39
AIR2
ATG3
BNR1
BPT1
BUB3
BUD19
CBT1
CTP1
DAL4
DBP7
DEP1
DFG16
DPH2
DUG1
EAF1
FIT2
FPS1
GEM1
GID8
GTR1
HFA1
HLJ1
HPC2
HRD1
IGO2
ILV6
IOC4
IRC13
ISW1
IXR1
KKQ8
LEO1
LIA1
LIP5
LRP1
MBP1
MEK1
MGA2
MNL2
MNN10
MRI1
MSN1
MTC4
MTC5
NEW1
NHP10
NTH2
NTH2
OCA1
PAA1
PEX13
PFK27
PHO86
PLB2
PSD2
PUS7
RLM1
ROD1
ROM2
ROX1
RPL14A
RPL31B
RPS0A
RPS14A
RPS16B
RPS18B
RPS21B
RPS26B
RPS6B
RPS8A
RRD1
RRF1
RRT8
RTF1
RTG1
RXT3
SAK1
SAP155
SDC1
SEA4
SGT2
SKI7
SKT5
SMI1
SNX4
SPT3
STP2
SWC7
SWD3
SYH1
TCB3
TCM62
TEF4
TNA1
URC2
URK1
VHS2
WWM1
YAF9
YFH7
YHM2
YOR1
